# Supplementary material
Source: PubMed Central journal article supplement (PMC6102136)
Supplement: supp_RA117.001267_134386_2_supp_154118_plbby7.pdf [file supp_RA117.001267_134386_2_supp_154118_plbby7.pdf]

**Supplemental Table 1.** Primers used for qPCR analysis in this study.

| Primer set    | Sense primer 5' →3'     | Antisense primer 5' →3'  |
|---------------|-------------------------|--------------------------|
| λ5            | AGGAGCAGAGCTGTGGGC      | GGCTTAGATGGAAGCCTATG     |
| VpreB         | GCTCATGCTGCTGGCCTATC    | CCAAGGGAAGAAGATGCTAATG   |
| μ heavy chain | GAATGTGTACACCTGCCGTG    | TCAGGTTAGCGGACTTGCTG     |
| Xbp1          | AAGAACACGCTTGGGAATGG    | CTGCACCTGCTGCGGAC        |
| Xbp1s         | AGTTAAGAACACGCTTGGGAAT  | AAGATGTTCTGGGGAGGTGAC    |
| CHOP          | GTCCCTAGCTTGGCTGACAGA   | TGGAGAGCGAGGGCTTTG       |
| BiP           | TCATCGGACGCACTTGGA      | CAACCACCTTGAATGGCAAGA    |
| Erdj3         | CCCCAGTGTCAAACCTGTACCAG | AGCGTTTCCAATTTTCCATAAATT |
